# Supplementary material for: Feasibility of 4 patient-reported outcome measures in a registry setting: A cross-sectional study of 6,000 patients from the Danish Hip Arthroplasty Registry
Source: PubMed Central journal article supplement (PMC3427620; doi:10.3109/17453674.2012.702390), 2012-08-25
Supplement: ORT-1745-3674-83-321-s5208.pdf [file ORT-1745-3674-83-321-s5208.pdf]

## Supplementary article data

# Feasibility of 4 patient-reported outcome measures in a registry setting

## A cross-sectional study of 6,000 patients from the Danish Hip Arthroplasty Registry

Aksel Paulsen<sup>1</sup>, Alma B Pedersen<sup>2</sup>, Søren Overgaard<sup>1</sup>, and Ewa M Roos<sup>3</sup>

<sup>1</sup>Department of Orthopaedic Surgery and Traumatology, Odense University Hospital, Institute of Clinical Research, University of Southern Denmark, Odense; <sup>2</sup>Department of Clinical Epidemiology, Aarhus University Hospital, Aarhus; <sup>3</sup>Research Unit for Musculoskeletal Function and Physiotherapy, Institute of Sports Science and Clinical Biomechanics, University of Southern Denmark, Odense, Denmark  
Correspondence: akselpaulsen@gmail.com

### Appendix

#### Supplementary data

Table 1. Imputing of missing items

| PRO   | Imputing of missing items                                                                                                                                                                          | Reference                                     |
|-------|----------------------------------------------------------------------------------------------------------------------------------------------------------------------------------------------------|-----------------------------------------------|
| EQ-5D | No imputing of missing values                                                                                                                                                                      | User Guide version 2.0                        |
| SF-12 | Maximum data recovery <sup>a</sup>                                                                                                                                                                 | QualityMetric Incorporated's scoring software |
| HOOS  | 1 or 2 missing values were substituted with the average value for that subscale. If more than 2 items were omitted, the response was considered invalid and no subscale score was calculated       | User's Guide 2003 (updated May 2008)          |
| OHS   | 1 or 2 missing values were substituted with the average value from all other responses. If more than 2 items were omitted, the response was considered invalid and no overall score was calculated | User Manual version 1.0                       |

<sup>a</sup> QualityMetric Incorporated's scoring software includes an MDE algorithm that enables scoring of PCS and MCS with missing item responses and we used QualityMetric Incorporated's scoring software with missing data estimation method; maximum data recovery (the exact procedure is not described (Ware et al. 2002)), to find percentage of discarded PRO subscales. For all other analyses, we used manual coding with no imputing of missing values.

Table 2. License requirements, fees, and websites

| PRO   | License requirements and fees                                                                                                                                                                                                                                           | Websites                                                                    |
|-------|-------------------------------------------------------------------------------------------------------------------------------------------------------------------------------------------------------------------------------------------------------------------------|-----------------------------------------------------------------------------|
| EQ-5D | A license for the study was obtained from the EuroQol Group. Academic and clinical use of EQ-5D is free of charge if patient numbers are less than 5,000. Where patient numbers exceed 5,000, the EuroQol Group will negotiate with users to collaborate and share data | <a href="http://www.euroqol.org">http://www.euroqol.org</a>                 |
| SF-12 | A license for the study was obtained from the Medical Outcomes Trust Health Assessment Lab and Quality Metric Incorporated. The fees associated with using SF-12 were altogether 1,569.90 USD (administrative fee, survey reference kit, and scoring software)          | <a href="http://www.sf-36.org">http://www.sf-36.org</a>                     |
| HOOS  | HOOS does not require any licence and is free of charge, even to the medical industry                                                                                                                                                                                   | <a href="http://www.koos.nu">http://www.koos.nu</a>                         |
| OHS   | A license for the study and translation was obtained from Isis Innovation. Academic and clinical use of OHS is free of charge                                                                                                                                           | <a href="http://www.isis-innovation.com">http://www.isis-innovation.com</a> |

Ware J E Jr, Kosinski M, Turner-Bowker D M, Gandek B. How to Score Version 2 of the SF-12 Health Survey (With a Supplement Documenting Version 1). 2002. Lincoln, RI: QualityMetric Incorporated.
